# Supplementary material for: 3D hybrid perovskite solid solutions: a facile approach for deposition of nanoparticles and thin films via B-site substitution
Source: Royal Society of Chemistry journal article supplement (doi:10.1039/c8nj06389c), 2019-01-01
Supplement: c8nj06389c1.pdf [file c8nj06389c1.pdf]

## Supporting information

### 3D Hybrid perovskites solid solution: A facile approach for deposition of nanoparticles and thin films via B-site substitution

Muhammad Aamir, Rana Farhat Mehmood, Arshad Farooq Butt, Malik Dilshad Khan, Mohammad Azad Malik, Neerish Revaprasadu, Jean-Michel Nunzi, Muhammad Sher, and Javeed Akhtar \*

Email: [javeed.chem@must.edu.pk](mailto:javeed.chem@must.edu.pk)

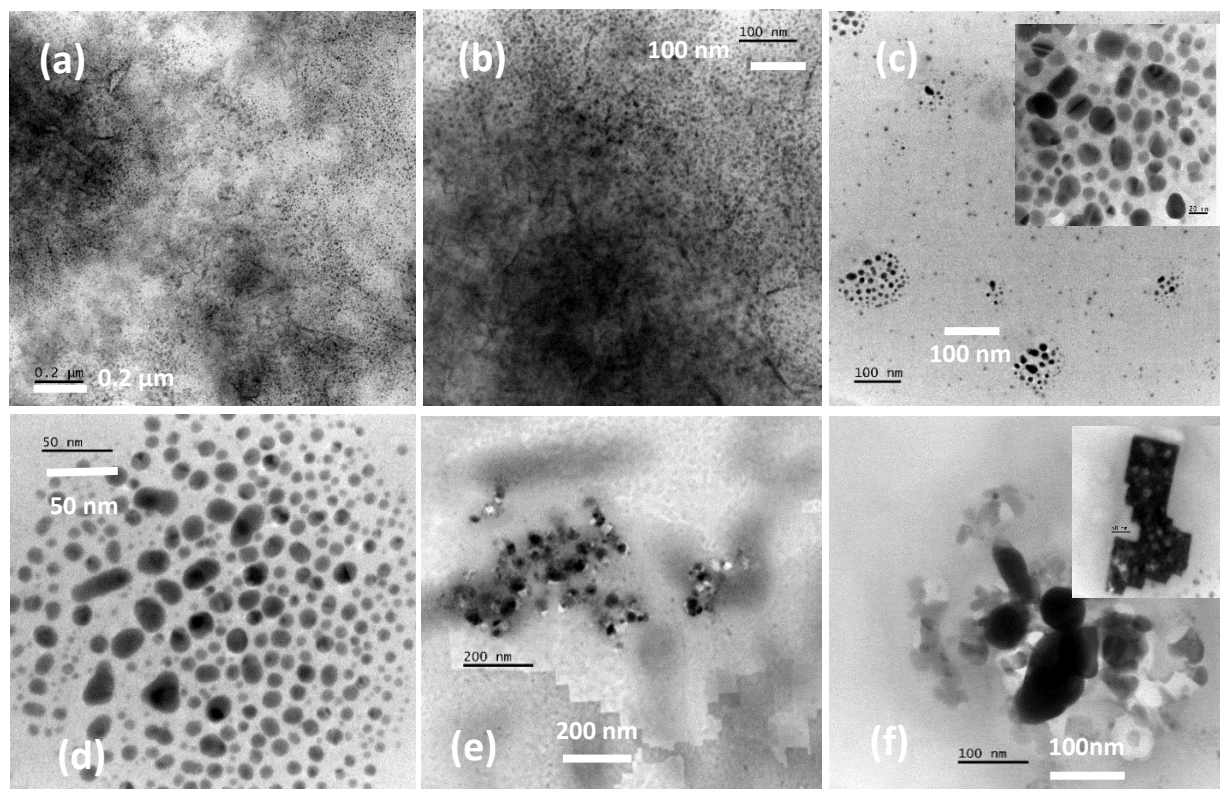

**Figure S1.** TEM images of as-prepared (a) CH<sub>3</sub>NH<sub>3</sub>PbBr<sub>3</sub>, (b) CH<sub>3</sub>NH<sub>3</sub>Pb<sub>0.8</sub>Cu<sub>0.2</sub>Br<sub>3</sub>, (c) CH<sub>3</sub>NH<sub>3</sub>Pb<sub>0.6</sub>Cu<sub>0.4</sub>Br<sub>3</sub>, (d) CH<sub>3</sub>NH<sub>3</sub>Pb<sub>0.4</sub>Cu<sub>0.6</sub>Br<sub>3</sub>, (e) CH<sub>3</sub>NH<sub>3</sub>Pb<sub>0.2</sub>Cu<sub>0.8</sub>Br<sub>3</sub> and (f) CH<sub>3</sub>NH<sub>3</sub>CuBr<sub>3</sub> perovskite nanoparticles at different magnifications

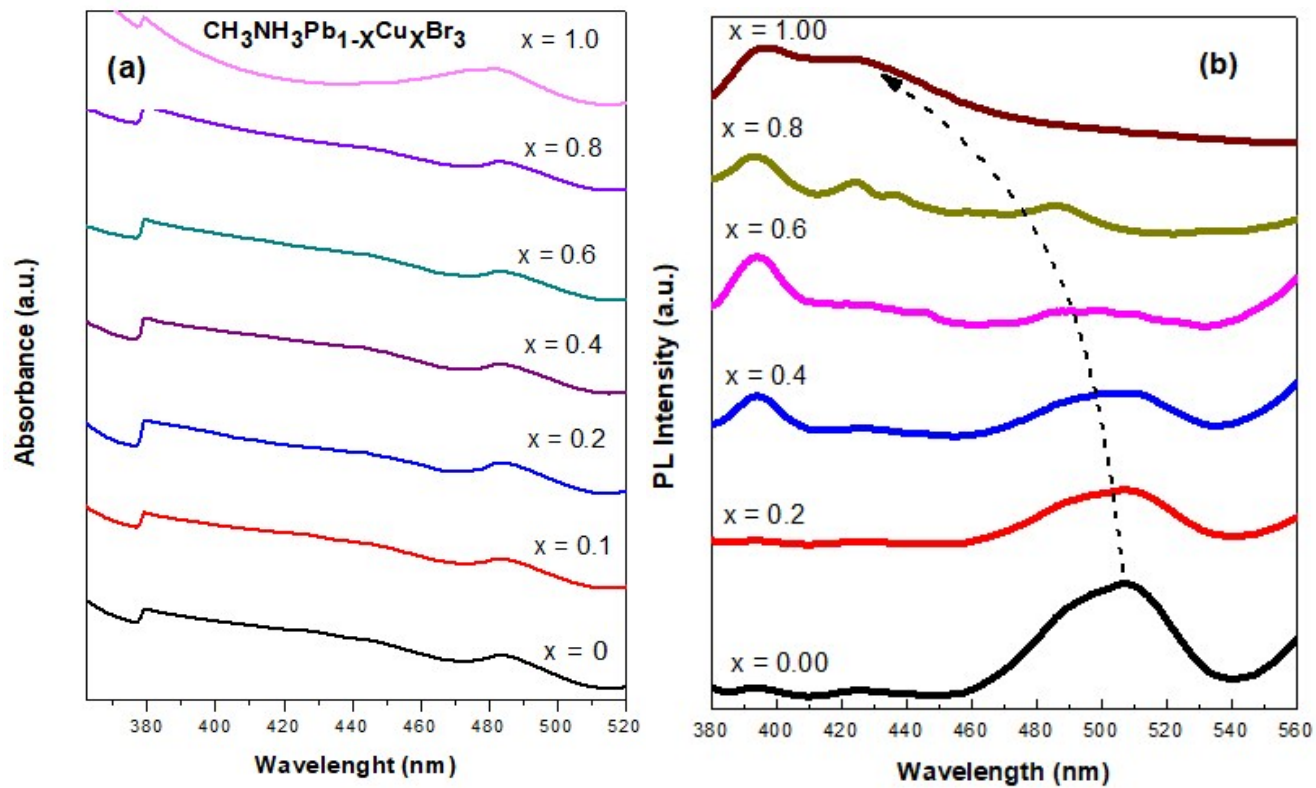

Figure S2. (a) UV-Vis spectra and (b) photoluminescence spectra of  $\text{CH}_3\text{NH}_3\text{Pb}_{1-x}\text{Cu}_x\text{Br}_3$  perovskite nanoparticles.

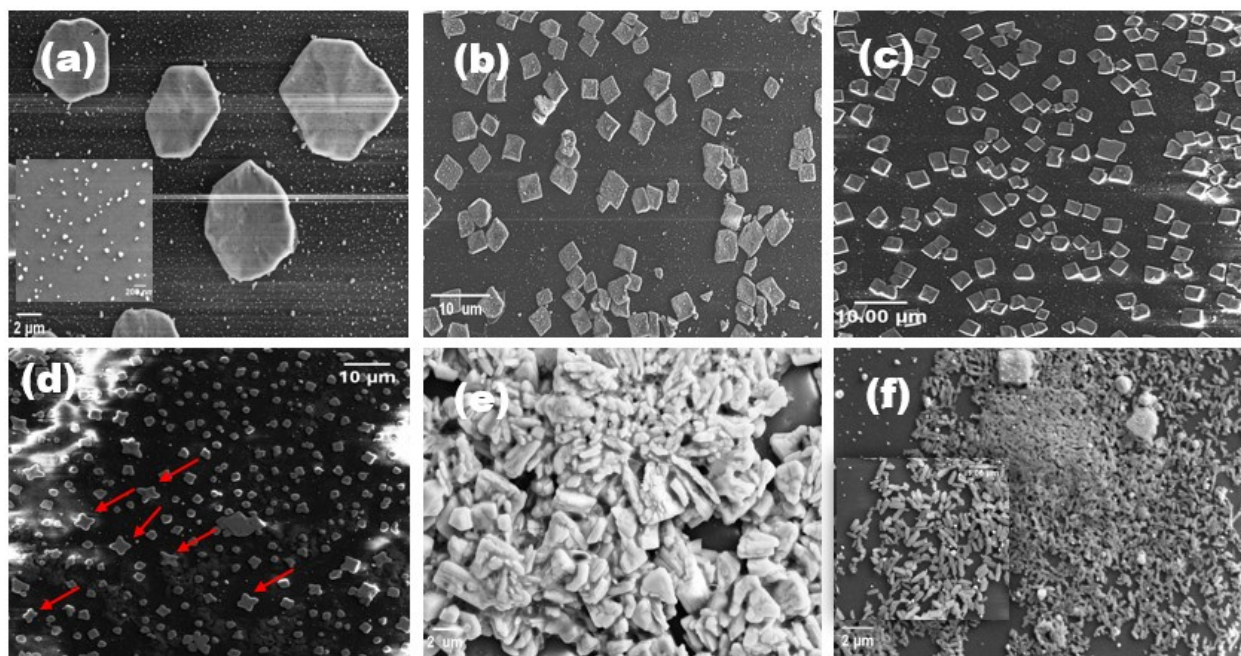

**Figure S3.** Field Emission Scanning Electron Microscopy images of as-synthesized (a)  $\text{CH}_3\text{NH}_3\text{PbBr}_3$ , (b)  $\text{CH}_3\text{NH}_3\text{Pb}_{0.8}\text{Cu}_{0.2}\text{Br}_3$ , (c)  $\text{CH}_3\text{NH}_3\text{Pb}_{0.6}\text{Cu}_{0.4}\text{Br}_3$ , (d)  $\text{CH}_3\text{NH}_3\text{Pb}_{0.4}\text{Cu}_{0.6}\text{Br}_3$ , (e)  $\text{CH}_3\text{NH}_3\text{Pb}_{0.2}\text{Cu}_{0.8}\text{Br}_3$ , and (f)  $\text{CH}_3\text{NH}_3\text{CuBr}_3$  at different magnifications.
